# Supplementary material for: Phytophthora infestans RXLR effector AVR1 disturbs the growth of Physcomitrium patens without affecting Sec5 localization
Source: PubMed Central journal article supplement (PMC8031463; doi:10.1371/journal.pone.0249637), 2021-04-08
Supplement: pone.0249637.s005.pdf [file pone.0249637.s005.pdf]

## Supporting Tables S1-S4

belonging to PlosOne publication entitled

# ***Phytophthora infestans* RXLR effector AVR1 disturbs the growth of *Physcomitrium patens* without affecting Sec5 localization**

by

**Elysa J.R. Overdijk, Vera Putker, Joep Smits, Han Tang, Klaas Bouwmeester, Francine Govers and Tijs Ketelaar**

**Table S1. Sec5 gene IDs.**

| <b>Gene</b> | <b>Code</b>              | <b>Resource</b> |
|-------------|--------------------------|-----------------|
| PpSec5a     | Pp1s41_289; Pp3c5_4060   | Cossmoss.org    |
| PpSec5b     | Pp1s38_295; Pp3c1_7430   | Cossmoss.org    |
| PpSec5c     | Pp1s18_342; Pp3c24_1100  | Cossmoss.org    |
| PpSec5d     | Pp1s11_129; Pp3c11_13110 | Cossmoss.org    |
| AtSec5a     | AT1G76850                | Arabidopsis.org |
| AtSec5b     | AT1G21170                | Arabidopsis.org |
| StSec5-1    | Sotub04g023510           | Solgenomics.net |
| StSec5-2    | Sotub12g024810           | Solgenomics.net |
| ScSec5      | P89102                   | Uniprot.org     |

**Table S2. Primers used in this study.**

| Primer                   | Use                                                            | Sequence (5' > 3')                         | Nr    |
|--------------------------|----------------------------------------------------------------|--------------------------------------------|-------|
| Sec5a-F                  | Cloning of Sec5a coding sequence for Y2H                       | CACCATGAGGGACGACGACGAG                     | 2857  |
| Sec5a-R                  | Cloning of Sec5a coding sequence for Y2H                       | CTAACCATCATGGAAGAGTCTTGAAC                 | E057  |
| Sec5b-F                  | Cloning of Sec5b coding sequence for Y2H                       | CACCATGGCGATGCGACATGACG                    | 2855  |
| Sec5b-R                  | Cloning of Sec5b coding sequence for Y2H                       | TTATCTCAAGTCATCGTTATCTACATAGGC             | E058  |
| Sec5c-F                  | Cloning of Sec5c coding sequence for Y2H                       | CACCATGTCGACAGCGGCTCAG                     | 2852  |
| Sec5c-R                  | Cloning of Sec5c coding sequence for Y2H                       | CTATGACTCCGGGATGGGAGG                      | E059  |
| Sec5d-F                  | Cloning of Sec5d coding sequence for Y2H                       | CACCATGGCGACGCGGGCGCC                      | 2860  |
| Sec5d-R                  | Cloning of Sec5d coding sequence for Y2H                       | CTATCTCAACTCATCGTTATCTACATAAATTTGAGG       | E060  |
| AVR1-F                   | AVR1 cloning                                                   | ATGTTTCGACCACGACAAGG                       | 2072  |
| Start-myc-F              | Myc-Cer-AVR1/ $\Delta$ T cloning                               | CACCGCAGAATGGGGTTAATTAACGGTGAAC            | E080  |
| Myc-cer-R                | Myc-Cer-AVR1/ $\Delta$ T cloning                               | CAGCTCCTCGCCCTTGCTCACGCTACCGTTCAAGTCTTCTC  | E081  |
| Cer-myc-F                | Myc-Cer-AVR1/ $\Delta$ T cloning                               | GAGGAAGACTTGAACGGTAGCGTGAGCAAGGGCGAGGAGCTG | E082  |
| Cer-AVR1-R               | Myc-Cer-AVR1/ $\Delta$ T cloning                               | GGAACCTTGTCGTGGTCAACTTGACAGCTCGTCCATGCC    | E083  |
| AVR1-cer-F               | Myc-Cer-AVR1/ $\Delta$ T cloning                               | GGCATGGACGAGCTGTACAAGTTCGACCACGACAAGGTTCC  | E084  |
| AVR1 $\Delta$ T-R-wistop | Myc-Cer-AVR1 cloning                                           | TTACCTCCACTTCACAGCCCGTGCC                  | E085  |
| AVR1-R-wistop            | Myc-Cer-AVR1 $\Delta$ T cloning                                | TTAAAATGGTACCACAACATGTCC                   | E086  |
| PIG1-locus-R             | Genotyping AVR1 moss lines                                     | CCCTCTGCCGACCCATATTTTC                     | E0114 |
| AVR1-koz-F               | Genotyping AVR1 moss lines and cloning of AVR1/ $\Delta$ T-myc | CACCGCAGAATGTTTCGACCACG                    | E0117 |
| 10myc-R                  | Cloning of AVR1/ $\Delta$ T-myc                                | GAAATTCGAGCCTAAGCACCGTTC                   | E0119 |
| AVR1-F-gt                | Genotyping AVR1 moss lines                                     | ATGGGGTTAATTAACGGTGAACAAAAGC               | E0120 |
| AVR1-R-gt                | Genotyping AVR1 moss lines                                     | AAATGGTACCACAACATGTCCACCAAG                | E0121 |
| AVR1 $\Delta$ T-R-gt     | Genotyping AVR1 moss lines                                     | CCTCCACTTCACAGCCCGTG                       | E0122 |
| T35S-F                   | Genotyping AVR1 moss lines                                     | TGCTAAGGCAGGGTTGGTTACG                     | JK130 |
| PpSEC5a_RNAi_F_XhoI      | Cloning Sec5RNAi construct                                     | CACCCTCGAGCCACCAATCAGCCGCCT                | E049  |
| PpSEC5a_RNAi_R_SalI      | Cloning Sec5RNAi construct                                     | AAAGTCGACCTCTGCTTGATCAACTCCACTCC           | E050  |
| PpSEC5b_RNAi_F_XhoI      | Cloning Sec5RNAi construct                                     | CACCCTCGAGAGCAGGACGAGGGAGA                 | E051  |
| PpSEC5b_RNAi_R_SalI      | Cloning Sec5RNAi construct                                     | AAAGTCGACTTCCAGGTCGAGGCTCG                 | E052  |
| PpSEC5c_RNAi_F_XhoI      | Cloning Sec5RNAi construct                                     | CACCCTCGAGCCTGCAAAAACACCATTGACGAT          | E053  |
| PpSEC5c_RNAi_R_SalI      | Cloning Sec5RNAi construct                                     | AAAGTCGACGAAAGCTCCAGATGAGGATCCTC           | E054  |
| PpSEC5d_RNAi_F_XhoI      | Cloning Sec5RNAi construct                                     | CACCCTCGAGGAAGACGACGAAGAAGAGGAGC           | E055  |
| PpSEC5d_RNAi_R_SalI      | Cloning Sec5RNAi construct                                     | AAAGTCGACGTTTCTCGAAGCTCCCGCA               | E056  |
| PpSec5a_qPCR_F           | qRT-PCR Sec5RNAi lines                                         | CGGTCAAACCTTCCGAGTACG                      | 2772  |
| PpSec5a_qPCR_R           | qRT-PCR Sec5RNAi lines                                         | TATGCCTCCATCACTGCCAAAT                     | 2773  |
| PpSec5b_qPCR_F           | qRT-PCR Sec5RNAi lines                                         | GGGGCAACGCCTATGTAGA                        | 2768  |
| PpSec5b_qPCR_R           | qRT-PCR Sec5RNAi lines                                         | ACACAGCCAGCTATTGCCTT                       | 2769  |
| PpSec5c_qPCR_F           | qRT-PCR Sec5RNAi lines                                         | ATGTCACAGGAGGAAATACAGG                     | E0164 |
| PpSec5c_qPCR_R           | qRT-PCR Sec5RNAi lines                                         | GTTTGAAGGTAGTCTGCAATGA                     | E0165 |
| PpSec5d_qPCR_F           | qRT-PCR Sec5RNAi lines                                         | CTCCGTGGCAACCCCTCAA                        | 2770  |
| PpSec5d_qPCR_R           | qRT-PCR Sec5RNAi lines                                         | CCCTGTGAGGCCTTCAATTCT                      | 2771  |
| PpEF1a_F                 | qRT-PCR Sec5RNAi lines                                         | AATCATACATTTACCTCGCC                       | 2764  |
| PpEF1a_R                 | qRT-PCR Sec5RNAi lines                                         | GATCAGTGGGTAGAAGTGAC                       | 2765  |

**Table S3. Plasmids used in this study.**

| <b>Plasmid</b>                       | <b>Usage</b>                                            | <b>Source</b> |
|--------------------------------------|---------------------------------------------------------|---------------|
| pENTR-D-TOPO-AVR1                    | Cloning of AVR1 inducible expression vector             | [15]          |
| pENTR-D-TOPO-A-L                     | Cloning of AVR1 inducible expression vector             | [15]          |
| pENTR-D-TOPO-AVR1 $\Delta$ T         | Cloning of AVR1 inducible expression vector             | [15]          |
| pENTR-D-TOPO-myc-Cer-AVR1            | Cloning of AVR1 inducible expression vector             | This study    |
| pENTR-D-TOPO-myc-Cer-AVR1 $\Delta$ T | Cloning of AVR1 inducible expression vector             | This study    |
| pGWB20-AVR1-10myc                    | Cloning of AVR1 inducible expression vector             | [15]          |
| pGWB20-AVR1 $\Delta$ T-10myc         | Cloning of AVR1 inducible expression vector             | This study    |
| pENTR-D-TOPO-AVR1-10myc              | Cloning of AVR1 inducible expression vector             | This study    |
| pENTR-D-TOPO-AVR1 $\Delta$ T-10myc   | Cloning of AVR1 inducible expression vector             | This study    |
| pPGX8                                | $\beta$ -estradiol inducible expression                 | [30]          |
| pPGX8-AVR1-myc                       | $\beta$ -estradiol inducible AVR1 expression            | This study    |
| pPGX8-AVR1 $\Delta$ T-myc            | $\beta$ -estradiol inducible AVR1 $\Delta$ T expression | This study    |
| pPGX8-myc-Cer-AVR1                   | $\beta$ -estradiol inducible AVR1 expression            | This study    |
| pPGX8-myc-Cer-AVR1 $\Delta$ T        | $\beta$ -estradiol inducible AVR1 $\Delta$ T expression | This study    |
| pENTR-D-TOPO-Sec5a                   | Cloning for yeast-two-hybrid assay                      | This study    |
| pENTR-D-TOPO-Sec5b                   | Cloning for yeast-two-hybrid assay                      | This study    |
| pENTR-D-TOPO-Sec5c                   | Cloning for yeast-two-hybrid assay                      | This study    |
| pENTR-D-TOPO-Sec5d                   | Cloning for yeast-two-hybrid assay                      | This study    |
| pDEST22-Sec5a                        | Yeast-two-hybrid assay                                  | This study    |
| pDEST22-Sec5b                        | Yeast-two-hybrid assay                                  | This study    |
| pDEST22-Sec5c                        | Yeast-two-hybrid assay                                  | This study    |
| pDEST22-Sec5d                        | Yeast-two-hybrid assay                                  | This study    |
| pDEST32-AVR1                         | Yeast-two-hybrid assay                                  | [15]          |
| pDEST32-AVR1 $\Delta$ T              | Yeast-two-hybrid assay                                  | [15]          |
| pDEST32-A-L                          | Yeast-two-hybrid assay                                  | [15]          |
| pDEST32-myc-Cer-AVR1                 | Yeast-two-hybrid assay                                  | This study    |
| pDEST32-myc-Cer-AVR1 $\Delta$ T      | Yeast-two-hybrid assay                                  | This study    |
| pGG626                               | Induced gene silencing in <i>P. patens</i>              | [31]          |
| pENTR-D-TOPO-Sec5RNAi                | Gene silencing of all four <i>P. patens</i> homologs    | This study    |
| pGG626-Sec5RNAi                      | Gene silencing of all four <i>P. patens</i> homologs    | This study    |

**Table S4. *Physcomitrium patens* strains used in this study.**

| <b><i>P. patens</i> line</b>      | <b>Representative clone(s)</b> | <b>Background strain</b> | <b>Reference</b>     |
|-----------------------------------|--------------------------------|--------------------------|----------------------|
| AVR1-myc/Sec5b-GFP                | 66, 127, 212                   | Sec5b-GFP                | This study           |
| AVR1-myc/Sec5d-GFP                | 147, 201, 208                  | Sec5d-GFP                | This study           |
| AVR1 $\Delta$ T-myc/Sec5b-GFP     | 5, 11, 224                     | Sec5b-GFP                | This study           |
| AVR1 $\Delta$ T-myc/Sec5d-GFP     | 27, 126, 148                   | Sec5d-GFP                | This study           |
| myc-Cer-AVR1/Sec5b-GFP            | 119, 125, 174                  | Sec5b-GFP                | This study           |
| myc-Cer-AVR1/Sec5d-GFP            | 9, 11, 26                      | Sec5d-GFP                | This study           |
| myc-Cer-AVR1 $\Delta$ T/Sec5b-GFP | 27, 235, 422                   | Sec5b-GFP                | This study           |
| myc-Cer-AVR1 $\Delta$ T/Sec5d-GFP | 3, 15, 18                      | Sec5d-GFP                | This study           |
| Sec6RNAi                          | 6                              | Sec6-GFP/Scamp4-mCherry  | [28]                 |
| Sec5RNAi                          | 18, 107                        | WT, Gransden isolate     | This study           |
| Sec5RNAi                          | 58                             | mCherry-Tua1             | This study           |
| WT, Gransden isolate              |                                |                          | [34]                 |
| Sec5b-GFP                         | 42                             | WT, Gransden isolate     | [34]                 |
| Sec5d-GFP                         | 39                             | WT, Gransden isolate     | [34]                 |
| mCherry-Tua1                      |                                | WT, Gransden isolate     | T. Miki, unpublished |
