# Supplementary material for: Phytophthora infestans RXLR effector AVR1 disturbs the growth of Physcomitrium patens without affecting Sec5 localization
Source: PubMed Central journal article supplement (PMC8031463; doi:10.1371/journal.pone.0249637), 2021-04-08
Supplement: pone.0249637.s006.pdf [file pone.0249637.s006.pdf]

## Addendum to Figure S1 in Overdijk et al.

### GENOTYPING

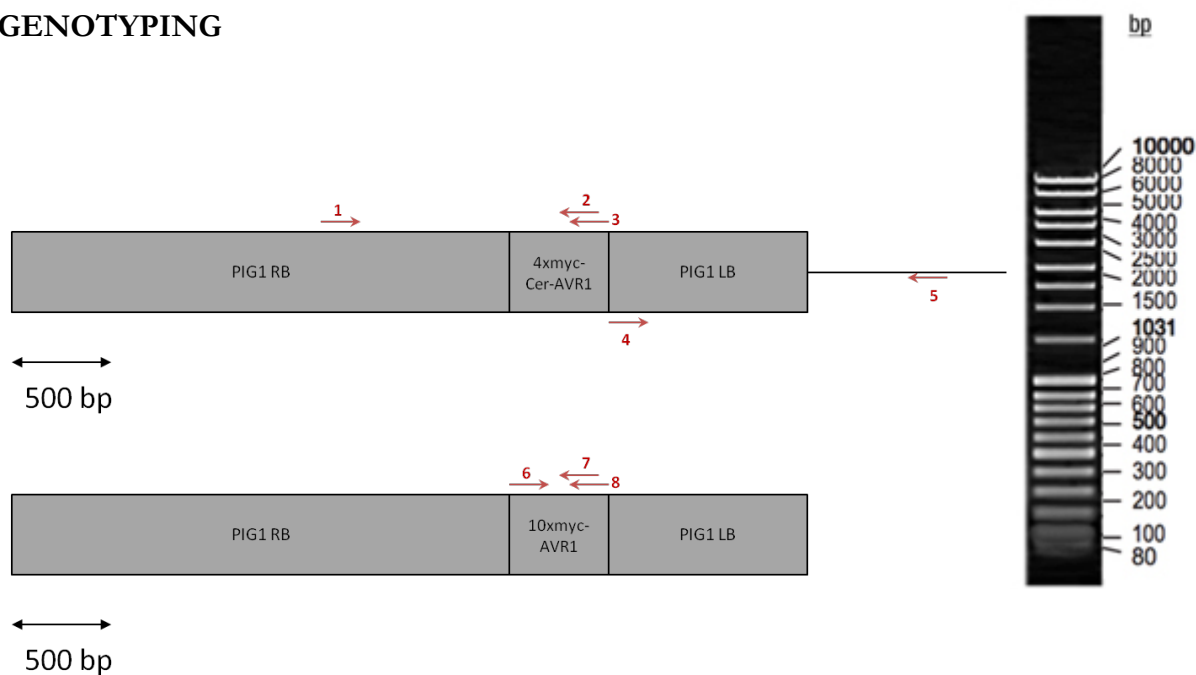

- 1: EO120
- 2: EO122
- 3: EO121
- 4: JK130
- 5: EO114
- 6: EO117
- 7: EO085
- 8: EO115

### Primers and programs used in this study

| Genotyping goal | Primers | Sequence (5'-3')             | Length (min) | T.an (°C) | T.ext (°C) |
|-----------------|---------|------------------------------|--------------|-----------|------------|
| AVR1_myc        | F EO117 | CACCgcagaATGTTTCGACCACG      | 00:02:00     | 55        | 72         |
|                 | R EO115 | TTAAAATGGTACCACAACATGTCCACC  |              |           |            |
| AVR1dT_myc      | F EO117 | CACCgcagaATGTTTCGACCACG      | 00:01:30     | 55        | 72         |
|                 | R EO85  | TTACCTCCACTTCACAGCCCCTG      |              |           |            |
| myc_Cer_AVR1    | F EO120 | ATGGGGTTAATTAACGGTGAACAAAAGC | 00:01:45     | 57        | 72         |
|                 | R EO121 | AAATGGTACCACAACATGTCCACCAAG  |              |           |            |
| myc_Cer_AVR1dT  | F EO120 | ATGGGGTTAATTAACGGTGAACAAAAGC | 00:01:45     | 57        | 72         |
|                 | R EO122 | CCTCCACTTCACAGCCCCTG         |              |           |            |
| Left Flank AVR1 | F JK130 | TGCTAAGGCAGGGTTGTTACG        | 00:04:00     | 53        | 67         |
|                 | R EO114 | CCCTCTGCCGACCCATATTC         |              |           |            |

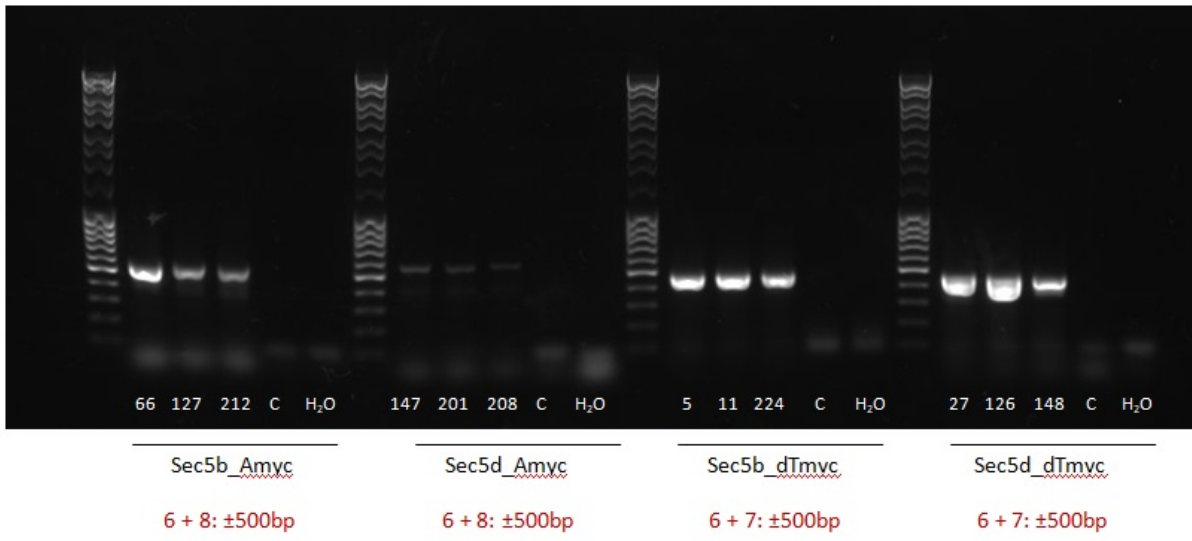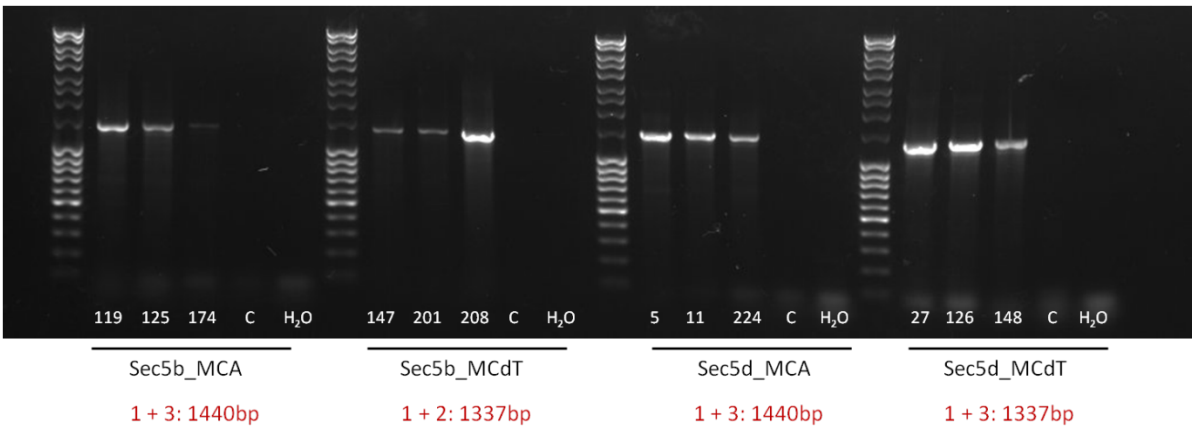

### Sec5b-GFP

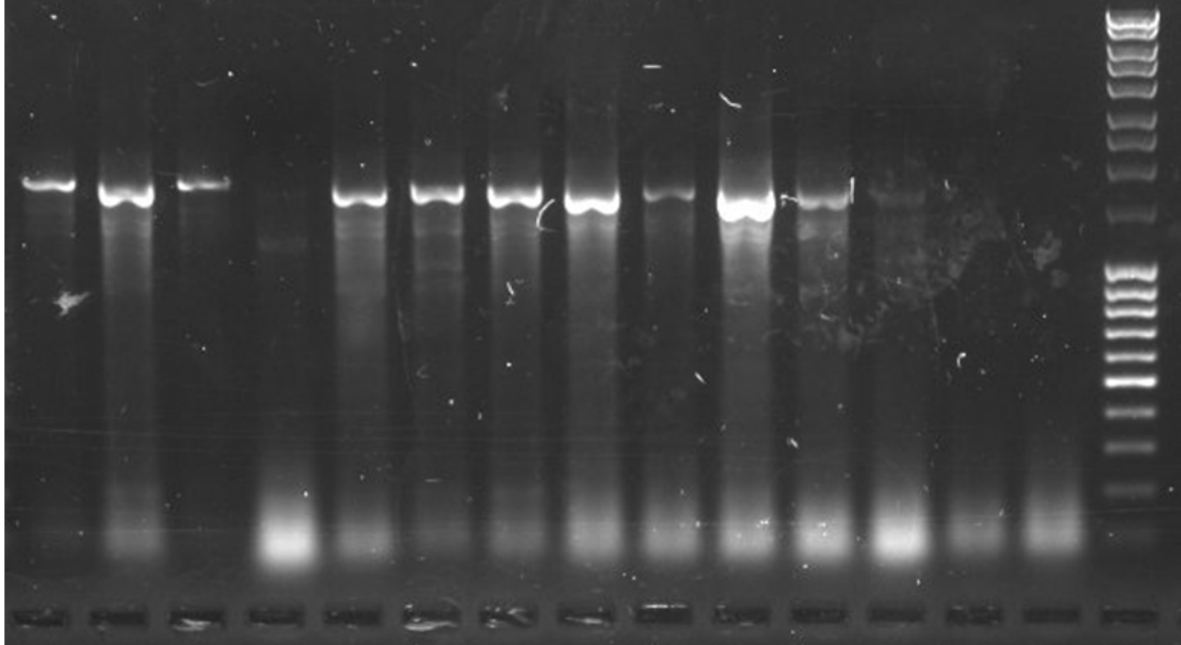

66 127 212 5 11 224 119 125 174 17 235 422 C H<sub>2</sub>O

Amyc

dTmyc

MCA

MCdT

4 + 5: ±1700kb

### Sec5d-GFP

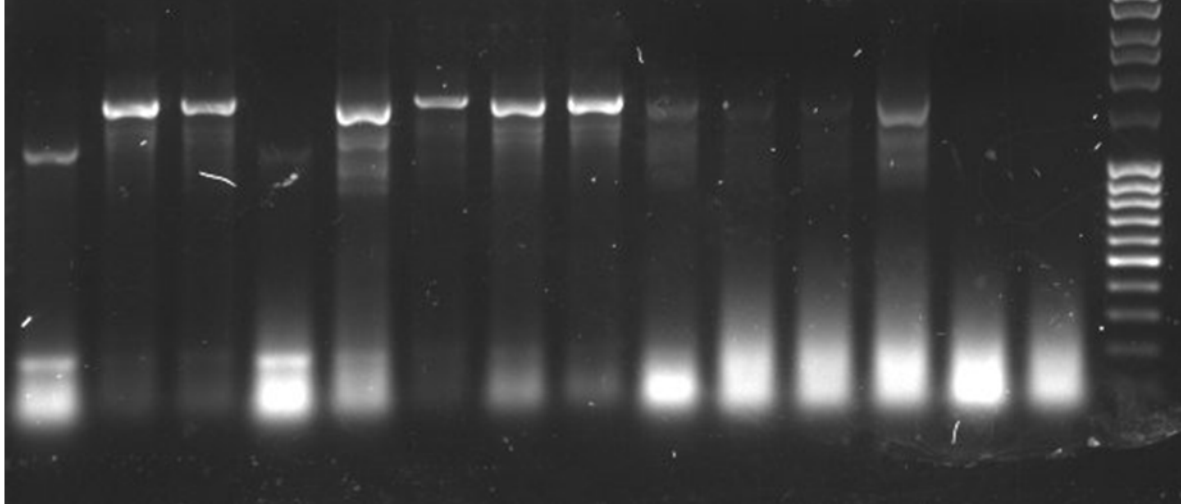

147 201 208 27 126 148 9 11 26 3 15 18 C H<sub>2</sub>O

Amyc

dTmyc

MCA

MCdT

4 + 5: ±1700kb
